# Supplementary material
Source: MDPI journal article supplement (https://www.mdpi.com/2073-8994/11/11/1364)
Supplement: s1 [file s1]

Id	A_RawCoord1	A_RawCoord2	A_RawCoord3	A_RawCoord4	A_RawCoord5	A_RawCoord6	A_RawCoord7	A_RawCoord8	A_RawCoord9	A_RawCoord10	A_RawCoord11	A_RawCoord12	A_RawCoord13	A_RawCoord14	A_RawCoord15	A_RawCoord16	A_RawCoord17	A_RawCoord18	A_RawCoord19	A_RawCoord20	A_RawCoord21	A_RawCoord22	A_RawCoord23	A_RawCoord24	A_RawCoord25	A_RawCoord26	A_RawCoord27	A_RawCoord28	A_RawCoord29	A_RawCoord30	A_RawCoord31	A_RawCoord32	A_RawCoord33	A_RawCoord34	A_RawCoord35	A_RawCoord36	A_Centroid_Size	A_LogCentroidSize	A_Symm1	A_Symm2	A_Symm3	A_Symm4	A_Symm5	A_Symm6	A_Symm7	A_Symm8	A_Symm9	A_Symm10	A_Symm11
1804560	7.41	79.6	50.1	89.3	83.3	-12.7	43.9	78.8	41	70.1	79.3	21.5	49.2	33.5	39.4	70.4	34	22.3	60.5	35.2	47.9	75.8	35.1	35.9	31.9	10.2	32.4	69.8	12.1	2.64	58	16.9	37.2	68.5	16.7	28.3	135.4475	4.9086	.2934	.3812	-.0744	.2934	-.3812	-.0744	.2652	.1205	.0357	.2652	-.1205
1811695	-10.1	80.3	36.7	66.5	88.9	-29.1	25.5	83.6	22.4	46	86.8	4.52	41.2	47.7	35.3	58	48.7	21.1	52.8	54.4	41	60.8	56.2	33.7	28.9	23.6	35.5	63.9	29.3	7.33	50.3	35.6	34.7	58.5	36.9	28.1	125.1065	4.8292	.2994	.4051	-.0605	.2994	-.4051	-.0605	.2546	.1094	.0268	.2546	-.1094
1611300	-57.4	50.3	-84.5	-25.3	35	17.2	-55.2	45.2	-44.3	-45.8	40.8	-19	-64.6	-.362	-49.7	-54.8	-5.97	-21.1	-78	1.41	-38.9	-71.6	-1.87	-19.4	-59	-21.1	-66.5	-43.5	-29.4	-19.1	-69	-19.2	-41.9	-64.7	-20.8	-28.4	137.5374	4.9239	.2856	-.3917	.0503	.2856	.3917	.0503	.2729	-.0994	-.0163	.2729	.0994
1525060	-8.54	103	-44.8	57.2	74.9	-113	17.5	97.8	-61.5	40.7	88.3	-85.6	29.7	64.8	-39.9	47.4	55.7	-56.8	44	70	-36.8	54.5	64.9	-46.7	16.6	40.6	-26.4	48.2	25.2	-57.5	39.1	49.9	-33	47.4	46.2	-40	129.0552	4.8602	-.2794	-.3827	-.0558	-.2794	.3827	-.0558	-.2721	-.1346	.0065	-.2721	.1346
1819910	-63.7	155	-47.9	41.5	162	-51.4	-28.4	162	-38.6	5.47	164	-39.2	-24.7	131	-7.33	7.74	131	-8.28	-17.8	138	1.8	1.64	139	1.99	-30.2	106	-6.87	16.4	106	-8.18	-15.2	121	1.96	.312	121	1.45	133.17	4.8916	-.2934	-.3961	-.0559	-.2934	.3961	-.0559	-.26	-.1274	.025	-.26	.1274
1606407	25.8	120	47.2	96	130	-21.1	59.1	120	33.2	80.7	123	11.7	69.5	80.3	34	89.5	83.1	15.1	82.8	83.1	39.9	94	84.8	29.6	52	59.4	28.2	87.1	65.8	-8.07	79.8	67.4	30.3	89.1	68.8	22.1	127.2563	4.8462	.2962	.3868	-.0615	.2962	-.3868	-.0615	.2457	.1203	.0315	.2457	-.1203
1802765	-70.4	24.7	-90.3	-18.2	51.8	-4.07	-67.9	33.1	-55.1	-49.8	43.2	-22.7	-77.8	-2.47	-34.7	-61.6	5.07	-7.31	-85.5	4.65	-24.4	-73.3	10.5	-5.81	-77.4	-31	-31.9	-54.5	-21.1	2.66	-81.1	-10.6	-15.4	-74.9	-7.95	-6.97	136.0825	4.9133	.311	-.3836	.0676	.311	.3836	.0676	.2458	-.1412	-.0367	.2458	.1412
1812292	35	66.6	34.8	67.6	87.4	-51.5	54.8	76.8	9.61	66.2	84.2	-18.4	65.8	33.2	.701	72.4	39.2	-22.9	82.7	34.5	-.872	85.2	38.5	-15.3	59.4	6.66	-1.01	70.1	16.4	-37	76.9	21.7	-8.56	79	23.9	-17.1	126.1714	4.8376	.2869	.3748	-.0592	.2869	-.3748	-.0592	.2978	.1233	.0242	.2978	-.1233
1601066	16.7	68.8	63.2	80.1	93.9	-22.1	46.9	75.3	40.3	65.9	83.3	13.2	57.2	33.6	33.7	73.7	40.2	10.7	74	34.2	38.5	84.2	40.8	22.4	41.8	8.23	31	74.4	19.6	-11.1	67.2	20.5	30.1	77	23.4	17.9	136.9582	4.9197	-.3988	.281	-.0535	.3988	.281	-.0535	-.1243	.2559	.0175	.1243	.2559
1711527	19.8	92.8	40	72.7	107	-45.2	45.5	98.9	19.5	64.8	105	-11.5	61.2	58.4	18.1	76.1	63.8	-6.99	75.7	59.5	22.3	85.8	61.8	8.54	49.9	35.2	18.4	75.9	43	-22.2	70.5	46.3	12.4	77.1	48.9	1.04	129.4058	4.863	.2816	.3914	-.0561	.2816	-.3914	-.0561	.2679	.143	.0298	.2679	-.143
1803798	-4.94	90.3	52.9	61.4	107	-26.4	23.5	97.2	31.8	44.8	102	6.72	39.9	46.7	29.1	59.2	52.2	6.37	58.6	48.2	35.6	68.8	51.1	22.5	33.3	19	28.6	65.4	29.4	-8.38	52	34	26.9	62.3	36.8	14.8	143.554	4.9667	.3019	.3647	-.0419	.3019	-.3647	-.0419	.293	.1157	.0164	.293	-.1157
1607994	-71.8	36.7	-59.2	-6.65	28.6	18.6	-55.7	37.3	-24	-38.3	35.9	-2.71	-74.7	2.43	-11.2	-59.1	-.367	7.91	-79.5	10.2	-2.84	-68.1	8.23	11.9	-79	-21.5	-25.3	-47.5	-26.8	13.2	-77.5	-10.4	-2.35	-69.6	-11.7	7.67	126.9024	4.8434	.2774	-.4011	.0661	.2774	.4011	.0661	.2604	-.1084	-.0201	.2604	.1084
1027210	20.3	96.9	39.7	82.2	103	-28.2	48.5	102	24.3	68.2	104	1.08	62	56.2	27.5	78.3	57.3	9.31	76.3	60.7	36.1	87.1	60.9	25.2	52	27.9	23.8	76.6	31.2	-9.61	71.8	37.9	22.8	78.3	38.3	14.6	132.6266	4.8875	.2924	.3473	-.067	.2924	-.3473	-.067	.2966	.115	.0113	.2966	-.115
1604828	-44.1	139	24.3	57.1	146	39.9	-11.7	141	42.9	23	143	47.7	-7.93	95.8	49.2	22.3	97.4	54.1	-.928	98.6	64.3	18.1	102	66.5	-13.2	80.6	34.4	33.5	84.5	40.7	4.54	84.5	51.2	16.1	84.9	52.4	128.8827	4.8589	.2853	.3984	-.0631	.2853	-.3984	-.0631	.2617	.1362	.0368	.2617	-.1362
1813608	50.1	34.2	18.3	83.8	39.1	-70.3	68.7	35.8	-7.63	80.2	36.5	-35.7	79.3	-6.33	-10.2	87.6	-8	-36.9	97	-5.28	-12.3	101	-6.26	-26.8	65.7	-31.4	-9.11	76.4	-30.1	-51.6	84	-24.7	-17.1	88.5	-24.9	-29.2	128.944	4.8594	.2925	.3683	-.0554	.2925	-.3683	-.0554	.2788	.1175	.0093	.2788	-.1175
1702903	57	88.3	1.52	111	91.2	-93.9	83.9	87.2	-24.5	103	88	-53.8	94.4	45.4	-22.7	112	45.1	-48.4	110	52.5	-19.5	120	52	-35.2	83.2	18.8	-18.5	112	19.8	-60.5	108	30	-26	114	30.5	-35.8	137.5706	4.9241	.2891	.3986	-.0592	.2891	-.3986	-.0592	.2496	.1271	.0179	.2496	-.1271
1804542	-2.4	97.6	28.7	80.5	117	-40.4	31.7	112	13.7	57.9	119	-7.83	57	78.6	30.8	77.2	83.1	14.3	63.4	89.8	38.2	80.2	94	24.3	53.8	46.7	35.4	89.5	54.1	6.67	69.7	66.3	34.1	80	69.3	26.9	137.9954	4.9272	.2699	.3973	-.0776	.2699	-.3973	-.0776	.2678	.1254	.019	.2678	-.1254
1707932	-7.37	84.7	3.82	68.2	74.1	-57.6	25.8	86.4	-12.6	47.5	82.7	-29.4	41.3	53.8	8.38	59.6	49.5	-4.87	54.2	61.8	15	64.7	58.9	7.45	30.6	29.8	16.4	65	24.4	-8.99	51.2	42.4	14.1	59.8	40.3	7.93	123.9394	4.8198	.2851	.3953	-.0598	.2851	-.3953	-.0598	.2729	.1117	.0199	.2729	-.1117
1602537	-6.76	71	34.8	59.1	75.8	-31.2	21.9	75.3	19.4	44.6	76.8	-3.81	38.7	36	26.9	55.3	37.4	10.4	51.6	43	32.3	60.7	44.3	21.5	24.7	7.05	26.5	58.4	9.78	-5.6	47.4	19.2	25.7	54.7	19.6	18.5	127.2352	4.846	.2815	.3669	-.0692	.2815	-.3669	-.0692	.2755	.1277	.0061	.2755	-.1277
1612946	-102	63.4	-46.3	-26.1	88.6	12.5	-83.4	74.8	-19.8	-58	84.6	.0504	-82.1	36.1	5.89	-64	43.2	20.5	-89.2	45.9	16.3	-74.9	52	26.2	-81	3.92	-2.5	-40.6	17.9	26.3	-78.8	19	17.6	-66.3	24.3	27.3	136.1071	4.9134	.2762	.3646	-.0705	.2762	-.3646	-.0705	.276	.1238	.0057	.276	-.1238
1523504	26.6	129	-29.9	100	114	-87.5	58.9	128	-44.5	77.8	125	-59.4	70.5	87.8	-18.9	91.9	82.9	-37	82	93.6	-15.7	96.2	90.9	-27.6	61.6	64.4	-9.24	94.8	55.7	-38.1	82.1	77.6	-14.6	92.1	74.4	-21.7	131.0172	4.8753	.3022	.3607	-.0542	.3022	-.3607	-.0542	.2956	.0925	.0198	.2956	-.0925
1600298	-76.5	109	-12.2	2.05	105	47.6	-56.7	110	13.8	-30.5	109	35.5	-64.5	65.9	28.3	-42.4	65	44.2	-67.7	69	41.7	-54.8	68.7	51.8	-64.8	39.8	11.2	-28.6	37.9	37.5	-62.2	48.8	36	-50.6	48.3	44.2	133.2127	4.8919	.2848	.3709	-.0608	.2848	-.3709	-.0608	.2823	.1276	.012	.2823	-.1276
1225134	28.5	131	12	73.8	149	-85.2	57.2	141	-16.7	70.4	147	-43.9	79.3	96.6	-16.8	91.4	103	-41.8	90	104	-12.6	101	110	-34.3	77.2	66	-14.8	96.4	74.6	-55.5	95.1	82.3	-23.7	99.4	84.7	-32.7	143.7724	4.9682	.2974	.3781	-.0697	.2974	-.3781	-.0697	.2765	.1072	.0303	.2765	-.1072
1602699	-4.77	44.1	-9.53	60.6	14.2	-81.9	31.1	33.1	-23.3	49.3	25.6	-42.9	38	-2.08	3.57	59.7	-13.3	-20.7	49.5	5.39	4.55	66	-2.47	-13.2	25.2	-26.5	15.8	58.8	-42.9	-20	51.8	-14.3	8.16	62	-19.7	-3.36	139.9329	4.9412	.3193	.3644	-.0678	.3193	-.3644	-.0678	.2457	.0992	.034	.2457	-.0992
1615003	29.2	90.1	12.4	86.2	87.2	-61.9	56.6	90.9	-7.86	73.6	89.9	-29.9	66.8	49.4	-.597	81.2	48.9	-20.5	76.2	53.8	2.23	88	53.8	-13.8	51.5	23.9	1.43	78.1	24.7	-33.2	76.1	32.2	-2.47	81.9	32.4	-10.8	124.325	4.8229	.286	.3769	-.0612	.286	-.3769	-.0612	.2792	.112	.0158	.2792	-.112
1805825	-102	95.5	-32.6	-24.2	94.9	33.4	-83.8	97.3	-2.27	-55.1	96	21.7	-85.3	50.4	6.91	-66.3	48.9	23.2	-90.5	50.8	20.1	-78.5	51.5	30.8	-87	27	-9.9	-48.3	25.3	21.8	-82.5	37.8	14.9	-74.2	37	22	133.9175	4.8972	.2858	.381	-.061	.2858	-.381	-.061	.2796	.1397	.0232	.2796	-.1397
1706687	27.7	109	40.4	70.3	129	-47	52.1	116	15.5	65.5	122	-12.2	63.1	73.2	11.2	74	78.4	-12.2	77.1	76.5	11.8	83	80.7	-2.06	48	49.4	12.6	71	59.5	-29.5	71.1	59.2	4.31	76.2	61.2	-4.79	128.8318	4.8585	.2894	.3853	-.0595	.2894	-.3853	-.0595	.2717	.1217	.0239	.2717	-.1217
1710736	-84.3	34.9	-66.5	-43.5	18.8	20.7	-78.6	29.3	-35.4	-65.8	24.5	-6.34	-89	-9.09	-34.9	-79	-13.8	-10.2	-102	-6.53	-22.4	-97.2	-9.17	-8.47	-79.5	-30.3	-54.2	-62.2	-37.6	-9.68	-90	-24.6	-29.4	-85	-26.7	-18	125.2718	4.8305	.271	-.3896	.0614	.271	.3896	.0614	.2558	-.1282	-.0041	.2558	.1282
1708188	-50.6	135	-31.7	11.4	127	49.6	-38.1	132	6.9	-19.5	130	29.9	-52.3	93.2	13.1	-33	89.6	35.5	-56.2	99.6	26.8	-46.4	97.5	37.4	-55	62.1	1.42	-26.5	59.1	37.3	-53.8	81.6	27.9	-47.5	80.5	35.2	132.2793	4.8849	.2921	-.3877	.0725	.2921	.3877	.0725	.2554	-.1121	-.0194	.2554	.1121
1505405	23.8	79.7	21.6	54.8	102	-68.6	42.9	89.2	-4.45	52.6	97.2	-37.5	63.8	46	-15.6	71.8	52.5	-35.3	79.2	49.4	-12.4	84.1	55.3	-25.7	52.6	20.2	-11.1	69.2	32.9	-55.5	72.7	35.3	-22	76.6	39	-33.1	132.7609	4.8885	.2955	.369	-.0499	.2955	-.369	-.0499	.2856	.1331	.0178	.2856	-.1331
1705952	16.7	61.3	19.4	70.9	67.8	-62.7	46.6	66.2	-.452	63.6	69.4	-27.5	65.9	25.7	4.18	78.3	27.5	-15.9	79.3	29.3	7.08	86.6	32.9	-5.38	55.7	-.292	8.72	83.2	4.52	-29.5	74.8	14.3	1.96	81.8	15.5	-10.2	129.7909	4.8659	.2999	.3799	-.0685	.2999	-.3799	-.0685	.2724	.1237	.0361	.2724	-.1237
1809704	28.1	62.6	24.5	58.6	79.7	-70.7	46.3	71.2	-4.64	55.8	77.3	-34.5	69	32.8	-10.5	75.5	36.6	-33.6	85	42.2	-9.58	88	44.9	-21.8	64.9	5.19	-7.87	78.1	11.9	-49.6	82.2	22.3	-14.1	86	24.6	-26	130.9478	4.8748	.2831	.3873	-.0578	.2831	-.3873	-.0578	.2748	.1219	.0105	.2748	-.1219
1607605	-74.9	81.3	-85.9	2.67	99.8	-11.9	-57.9	87.3	-54.2	-29.4	93.9	-26.6	-68.4	45.4	-31.1	-42.3	51.5	-7.02	-72	53.8	-23.1	-53	58.2	-4.95	-71.6	9.34	-36.8	-30.2	19.5	2.37	-70.4	30.2	-12.5	-55.6	34.1	-.671	151.4389	5.0202	.2971	-.3592	.054	.2971	.3592	.054	.2612	-.1328	-.0118	.2612	.1328
1610334	-86.3	106	-70	-44.6	91.1	18.8	-82.1	103	-35.2	-68.7	97.5	-5.9	-91.2	58.5	-34.4	-78.3	52.9	-8.28	-101	57.1	-21.5	-95.1	54.1	-9.17	-83	37.8	-53.8	-59.7	30.5	-8.15	-91.5	40.9	-27	-85.9	38.7	-16.4	131.8836	4.8819	.2804	-.3762	.061	.2804	.3762	.061	.277	-.1238	-.0245	.277	.1238
1812273	-79.6	114	-68.1	-38.5	96.1	15	-73.8	111	-36.3	-59.5	104	-7.5	-89.1	67.3	-31.8	-78.5	62.5	-13	-97.6	72.3	-22.2	-89.9	69.7	-8.43	-88.2	45.2	-51.4	-67.2	36	-11.9	-92.1	52.6	-28.9	-85.8	49.5	-17.6	127.3173	4.8467	.2858	-.3708	.0618	.2858	.3708	.0618	.2836	-.1292	-.0107	.2836	.1292
1617012	-155	254	-22.5	-86	237	45.1	-139	249	9.6	-119	245	28.4	-149	204	13.1	-129	199	29.8	-154	200	26.5	-142	199	36.1	-146	184	-12.3	-108	176	21.6	-144	185	15.5	-134	183	23.6	132.9892	4.8903	.2852	.3687	-.0636	.2852	-.3687	-.0636	.2828	.1043	.023	.2828	-.1043
1811166	-66.4	81.3	-37.2	34.4	89.2	-27.8	-34	88.9	-24.5	-1.69	93.2	-21.5	-31.5	52.7	11.2	-4.76	57.5	11	-28.3	62.7	23.6	-12.1	64.2	25	-41.9	24.2	7.31	8.51	30.7	12.7	-27	43.6	22	-8.8	46.5	24.5	139.0624	4.9349	.2988	.3652	-.0548	.2988	-.3652	-.0548	.2798	.1176	.024	.2798	-.1176
1710143	-92.5	106	-63.8	-19	104	9.42	-75.3	107	-33.4	-50.3	107	-8.15	-85.3	64.4	-18.3	-67.2	63.9	.4	-92.2	70	-5.98	-82.2	71.3	7.62	-87.9	39.4	-34.9	-54.6	39.3	.777	-85.8	51.9	-10.1	-77.3	51.6	-.109	133.948	4.8975	.2839	-.3874	.0573	.2839	.3874	.0573	.27	-.1326	-.014	.27	.1326
1613759	12.4	69.3	39.3	79	76.4	-28.7	40.8	72.4	24.9	63.2	73.9	.172	53.3	29.6	28.5	73.2	28.5	10.7	65.6	32.6	36.5	78.7	33.9	24.2	36.9	4.85	25.3	72.3	6.28	-6.52	62.4	14.1	26.3	70.8	14.4	19.2	130.4458	4.871	.2934	.3659	-.0576	.2934	-.3659	-.0576	.2763	.1279	.0138	.2763	-.1279
1804561	-76.9	41.1	-67.1	-6.32	66.9	-2.07	-59.4	54.8	-38.9	-35.3	64	-18.4	-62.7	16.9	-12	-45.9	23.3	1.66	-70.2	23.5	-1.3	-56.8	28.7	9.72	-63	-13.3	-20.5	-30.6	-.735	9.77	-62.3	3.77	-.506	-53.3	7.56	7.61	131.6263	4.88	.2805	-.3776	.0601	.2805	.3776	.0601	.2863	-.1251	-.0143	.2863	.1251
1800913	31.1	65.9	6.05	88.9	51.1	-74.4	59.7	63.3	-17	76.2	58.1	-40.2	70.7	18.9	-.838	84.6	13.5	-22.4	88.4	21.4	4.73	98.3	18.2	-9.28	56.1	-3.62	6.94	81.3	-12	-31.1	78.2	3.14	-.242	85.2	.401	-10.9	135.5466	4.9093	.2992	.3694	-.052	.2992	-.3694	-.052	.285	.1068	.0201	.285	-.1068
1717871	-88.2	30.8	-91.2	-55.9	31.7	7.84	-89.1	32.5	-55.3	-79.1	32	-22.6	-98.4	-12.6	-51.2	-89	-11.8	-24	-110	-8.19	-38.9	-106	-7.73	-26.1	-91	-36.9	-67.4	-73.5	-36.9	-14.4	-104	-28.9	-40.7	-100	-29	-28.6	136.9919	4.9199	.2825	-.3802	.0639	.2825	.3802	.0639	.2658	-.1248	-.0247	.2658	.1248
1715410	-92.6	73.7	-36.3	-9.72	56.2	24.1	-68.3	71	-5.11	-47.7	66.5	9.33	-83.6	28	-1.08	-59	23.6	17.1	-86.7	31	10.3	-70.5	26.7	23.4	-89.3	1.68	-15.6	-52.8	-7.88	14.3	-85	10.8	12.1	-74.7	8.04	18.8	135.1899	4.9067	.2794	.3848	-.062	.2794	-.3848	-.062	.2799	.0945	.0215	.2799	-.0945
1428557	-72.1	102	-18.5	21.2	112	-14	-41.5	112	-8.15	-12.7	115	-6.94	-39	76.4	22.5	-13.8	78.1	22.7	-35.5	85.9	32	-17.2	87.3	32.2	-45.3	47.7	17.9	-1	51.6	20.4	-30.8	65	30.9	-19	66	31.8	128.6763	4.8573	.2884	.365	-.0676	.2884	-.365	-.0676	.2864	.1126	.0177	.2864	-.1126
1808561	-11.2	108	13	60.2	87.9	-54	16.8	106	-2.44	44	99.2	-25.5	30.2	61	18	47.8	56.9	-1.59	40.1	66.5	24.4	56.4	63	9.82	14.9	33.9	26.1	49.3	25.8	-5.36	38	40.3	22.1	46.8	38	12.8	140.54	4.9455	.2914	.3557	-.0574	.2914	-.3557	-.0574	.293	.1291	.013	.293	-.1291
1604023	-4.91	68.2	10.2	59.2	54.9	-55.3	26.3	63.2	-6.84	43.8	59.5	-24.8	34	27.4	6.06	52.4	22.1	-11.8	45	30.8	11.1	56.6	27.1	-1.17	23.1	5.81	14.7	53.7	-2.17	-17.9	44.9	17.1	8.1	51.9	15.2	-.114	118.8385	4.7778	.2997	.3898	-.0555	.2997	-.3898	-.0555	.2611	.1067	.0228	.2611	-.1067
1808212	21.2	44.2	17.6	51.2	48.5	-68.7	39.6	50.7	-8.79	48.4	52.9	-35.6	52.3	8.63	-10.6	58.2	10.7	-31.7	66.1	13.1	-10.3	69.2	14.8	-23.6	38.1	-15.7	-5.06	54.1	-11.1	-47.6	58.6	-2.4	-17.1	61.8	-1.49	-26.5	119.5762	4.784	.2648	.3825	-.0667	.2648	-.3825	-.0667	.2916	.1184	.0133	.2916	-.1184
1715244	-14.3	40.9	21.9	72.4	45.3	-36	22.1	43.6	11.3	47.8	44.6	-5.35	34.2	.0782	16.1	53.7	1.2	4.9	43.9	6.51	25.2	58	7.29	17.4	21.2	-23.6	13.1	55.4	-22.8	-9.63	42.6	-13	16.5	51.9	-12.5	10.8	129.6961	4.8652	.2855	.4024	-.068	.2855	-.4024	-.068	.2694	.1181	.0204	.2694	-.1181
1810841	1.48	77.6	-4.18	78.1	72.2	-72.1	39.4	76.6	-19.7	62.9	75.2	-43.8	53.2	38.9	-7.49	71.8	35.3	-26.6	65.8	42.9	-2.33	79.2	41.2	-16.5	39.2	14.9	-3.87	70.5	9.74	-37.2	61.7	28.2	-7.37	71.8	26.8	-18.4	129.5149	4.8638	.2916	.3959	-.064	.2916	-.3959	-.064	.2557	.1302	.0266	.2557	-.1302
1618317	-86.7	94.8	-48.9	-25.6	101	26.2	-74.1	102	-15.5	-57.2	103	5.97	-85.2	55.8	-5.42	-70.2	56.5	14.8	-96	60	9.36	-85.3	61.5	21.7	-83.8	35.4	-21.7	-52.5	38	16.8	-85.4	42.2	3.16	-76.5	43.1	13.5	130.6839	4.8728	.2869	-.3711	.0619	.2869	.3711	.0619	.2868	-.1047	-.0332	.2868	.1047
1819965	-75.1	82.2	-46.9	-25.7	67.9	37.1	-64.9	76.2	-12.6	-48.9	72.5	12	-70.9	29.2	-13.6	-57.7	25.6	8.35	-81.9	27.4	-2.25	-74	26.3	11.5	-63.6	5.38	-34.8	-38.2	.431	7.56	-70	8.94	-6.23	-64.7	8.13	2.78	136.1857	4.914	.2948	-.3616	.0508	.2948	.3616	.0508	.2853	-.1085	-.0069	.2853	.1085
1806513	34	98	33.9	79.3	120	-57.1	59.6	107	9.41	74.6	115	-20.3	76.3	72.5	7.27	89.8	80	-23.4	86.7	77.4	8.2	96.8	83.1	-16.2	72.5	39.8	4.6	89.5	52.8	-42.2	93.1	63.7	-2.01	97.3	66.8	-14.1	130.8926	4.8744	-.3972	.2632	-.0729	.3972	.2632	-.0729	-.1308	.2456	.0193	.1308	.2456
1700282	2.43	110	8.49	72.1	91.6	-60.5	31.9	105	-8.15	54.9	99	-31.6	42.7	64.3	8.93	61.5	60.2	-9.87	53.9	71.1	12.9	67.7	67.9	-2.94	28.3	40.7	12.6	60.8	32.7	-19.4	54.2	51.3	11.1	61.9	49.5	3.36	130.3602	4.8703	.289	.3827	-.0536	.289	-.3827	-.0536	.2686	.1281	.0104	.2686	-.1281
1509474	-45.3	70.2	5.08	51.9	71	28	-13.1	69.5	24.1	12.3	69.9	30.6	-12	28.7	35.8	10	29.7	40.9	-10.9	35.2	47.2	4.15	35.5	51.2	-21.7	5.51	24.7	23.1	6.93	33.1	-7.19	14.9	44.4	3.25	15.4	46.2	125.4136	4.8316	.2929	.3982	-.063	.2929	-.3982	-.063	.2601	.1045	.0218	.2601	-.1045
1804437	-85.2	81.6	-43.6	19.2	92	-31.9	-49.9	87.3	-23.8	-18.8	89.9	-20.9	-49.8	47.4	-6.6	-17.5	51.4	-3.43	-42.8	52.1	8.24	-26.4	54.1	9.46	-51.7	24.1	-11.3	-9.28	29.6	-7.37	-39	36.1	-1.28	-27.3	37.5	.18	130.674	4.8727	.2993	.404	-.0673	.2993	-.404	-.0673	.254	.1199	.0427	.254	-.1199
1703123	-3.05	51.9	24.1	81.7	55.9	-20.2	29	54.6	19	56.5	56.1	3.69	37.9	15.1	30.2	62.5	16.5	17	50.6	18.6	41.4	63.7	19.3	34.6	21.5	-6.71	21.5	67.3	-3.64	-1.01	46.6	2.16	30.1	58.4	2.86	24.1	125.4154	4.8316	.2786	.3816	-.0566	.2786	-.3816	-.0566	.2624	.1255	.0218	.2624	-.1255
1801133	11.8	76.7	4.15	74.8	47.2	-55.7	37	67.7	-11.9	55.5	59.9	-28.2	43.9	31.9	9.38	59.3	26.1	-5.53	55.1	37.7	12.4	65.8	35.4	.634	27.2	12.2	16.2	57.7	.352	-7.12	49	19.1	11.9	56.9	15.9	5.96	118.0221	4.7709	.2883	.389	-.0518	.2883	-.389	-.0518	.2747	.1096	0	.2747	-.1096
1615878	-32.3	31.1	16.9	24.7	41.7	-69.8	-1.8	36.5	-7.07	15.5	40.3	-35.7	15	-5.04	-.813	33.6	.773	-32.6	31.4	-1	-2.29	40.4	2.13	-17.7	7.11	-25.5	-.426	32.7	-19.1	-40.8	30.2	-11.1	-7.27	36.2	-10.4	-15.8	130.9129	4.8745	-.2911	-.3984	-.0499	-.2911	.3984	-.0499	-.2596	-.1286	.0351	-.2596	.1286
1713461	-67.7	113	-64.3	-19.9	104	16.3	-62.8	111	-33.2	-44.6	108	-3.88	-65.8	66.5	-30.2	-53.3	65.2	-10.2	-74.2	66	-17.4	-67.1	65.5	-6.16	-60	47.6	-48	-38.4	44.6	-8.4	-64.4	51.6	-23.7	-59.5	51.4	-15.5	124.2162	4.822	.2865	-.379	.0631	.2865	.379	.0631	.2814	-.1394	-.0281	.2814	.1394
1619569	22.9	52.2	10.8	65.6	52.7	-86.1	49.2	58.7	-18.6	61	59.2	-48	72.6	11.3	-13	81.3	12.9	-38.1	92.2	20.8	-12.9	97.7	21.2	-29.2	59.7	-24.6	-4.82	79.1	-19.8	-53.5	83.7	-9.63	-16.3	88.4	-8.61	-30	150.4066	5.0133	.2829	.352	-.0755	.2829	-.352	-.0755	.2888	.1054	.0133	.2888	-.1054
1819522	-86.1	149	27.2	20.3	152	-2.45	-45.5	151	30.3	-14	152	21.4	-45.2	106	43.4	-8.25	106	33.9	-31.3	109	59.2	-9.34	112	52.4	-53.2	72.9	37.5	.585	74.6	24.3	-29.2	89.1	52.7	-14.1	89.9	48.5	148.9549	5.0036	.2888	.371	-.0663	.2888	-.371	-.0663	.2628	.1099	.0231	.2628	-.1099
1614622	-20.4	72.8	30.3	46.4	83.7	-32	8.95	78.8	11	26.5	81.5	-7.55	22.2	38.5	19.3	40.2	41.7	2.81	35.5	46.5	25.2	43.8	48.4	16.1	12.6	11.2	22	47.1	15.6	-9.72	34.8	24.7	20.2	42.8	25.1	12.1	124.4336	4.8238	.2846	.3697	-.0475	.2846	-.3697	-.0475	.2832	.1031	-.0041	.2832	-.1031
1511903	24	64.2	37.2	84.6	68.6	-35.2	53.7	64.8	19	73.7	66.8	-6.48	69.2	22.3	21.3	84.2	23.8	2.76	80.7	24.1	25.4	90.9	25.3	12.6	52.8	-1.79	21.9	81.7	1.81	-13.8	75.1	5.98	16.7	81.9	6.41	7.97	128.6941	4.8574	.3052	.3672	-.0571	.3052	-.3672	-.0571	.2764	.1261	.0206	.2764	-.1261
1709141	-75.8	27.2	-57.7	-25.5	29.9	19.2	-65.9	31.4	-26.3	-51.7	31.6	-4.09	-73.5	-12.2	-21.4	-58.6	-11.5	.746	-81.5	-5.99	-14.6	-69.7	-6.35	4.86	-65.5	-34.6	-39.1	-38.1	-34.6	2.27	-71.8	-27.1	-12.2	-65.7	-26.9	-3.02	124.5227	4.8245	.268	-.3691	.067	.268	.3691	.067	.281	-.1059	-.0084	.281	.1059
1402600	11.4	118	44.6	99.1	128	-3.98	45.5	122	38.7	74.1	127	22.4	54.2	80.4	40.8	78.6	83.1	28.9	66.1	83.8	54.4	81	85	47.5	38.1	60.2	30.6	82.3	64.3	8.88	63.5	70.9	39.5	73.7	71.3	35	127.4239	4.8475	-.3954	.2674	-.0665	.3954	.2674	-.0665	-.1304	.2631	.022	.1304	.2631
1614454	29	85	-44.4	96.2	65.9	-108	59.5	79.5	-58.6	81.5	73.1	-80.6	69.2	41.8	-42.3	87.6	36.4	-59.9	81.7	46.3	-37.2	94.1	42.8	-48.7	52.7	19	-34.7	87	9.04	-69.5	78.3	24.2	-41.5	85.2	22	-48	127.3268	4.8468	.2944	.371	-.0598	.2944	-.371	-.0598	.2667	.1248	.0162	.2667	-.1248
1407738	15	37.9	17.1	50.4	47.7	-67.7	35.3	44.4	-8.02	47	48	-35.3	47.8	1.44	-7.42	58.3	4.49	-33.1	64.8	6.26	-6.19	70.1	8.78	-21.2	31.6	-20.5	-3.5	52.1	-14.7	-49.6	57.4	-8.18	-14.8	61.5	-7.41	-25.5	124.3477	4.8231	.2742	.3717	-.0603	.2742	-.3717	-.0603	.2794	.1202	.0184	.2794	-.1202
1709749	-78.6	23.9	-81.4	-18	51	-11.1	-68.5	36.1	-52.4	-48.3	44.1	-28.3	-75.3	2.22	-25.8	-60.7	6.21	-6.31	-83.3	9.29	-14.2	-76.5	10.7	-3.68	-73.8	-24	-29.9	-47.1	-15.1	.34	-75	-8.54	-12.4	-69	-6.56	-5.24	127.1922	4.8457	.3022	-.3803	.0611	.3022	.3803	.0611	.2726	-.1276	-.0278	.2726	.1276
1013074	-4.48	61.3	-12.9	73.7	41.5	-65.2	26.1	61.9	-25.3	50.1	55.9	-42.6	38.5	28.2	-3.65	55.9	25	-16.2	47.6	35.5	1.68	60.1	33.1	-5.51	17.9	5.68	4.57	59.9	-3.13	-22.4	44	16.7	2.58	54.3	14.5	-4	121.5627	4.8004	-.2553	-.3955	-.0656	-.2553	.3955	-.0656	-.2753	-.1241	.0109	-.2753	.1241
1612219	-60.9	36.4	-21.9	41.8	37.5	-18.5	-23.9	41.4	-12.4	5.82	42.2	-12.7	-22.6	9.43	13.5	7.07	8.68	14.4	-16.9	17.5	28.4	2.59	18.3	27.2	-31.1	-15.5	13.8	18.6	-15.4	11.7	-14.3	-1.54	23.8	-.477	-1.79	23.6	128.1582	4.8533	-.4009	.2724	-.0542	.4009	.2724	-.0542	-.1161	.2628	.0158	.1161	.2628
1620504	-20.3	140	-19.3	73	141	7.06	9.45	138	2.8	39.2	139	10.1	14.2	94	-.894	38	94.8	3.88	17.6	92.6	14.7	32.7	94.5	16.7	6.66	76.4	-20.5	50.6	76.3	-11	19.9	84.2	2.75	32.1	84.8	5.29	124.8897	4.8274	.2838	.3882	-.0725	.2838	-.3882	-.0725	.2737	.1228	.03	.2737	-.1228
1612729	17.8	51.2	25	68.2	71.2	-51.1	43.1	61.3	2.47	57.7	66.6	-18.1	63.8	20.9	12.1	80.2	26.5	-8.72	75.4	29	16.7	85.6	31.8	4.56	54.6	-5.34	9.98	82.9	4.72	-26.5	75	6.01	6.48	82.2	8.22	-2.66	129.2941	4.8621	.2972	.3611	-.0582	.2972	-.3611	-.0582	.2831	.0997	.0135	.2831	-.0997
1616929	20.1	17.6	6.72	55.6	37.1	-81.8	40.2	27.3	-18.7	52.2	31.6	-47.1	48.2	-13.5	-26.9	56.9	-9.6	-47.5	60.5	-10.9	-23	67.7	-8.65	-38.3	29.8	-37.9	-26.2	48.9	-31.9	-66.5	53.7	-29.9	-34.2	58.6	-27.6	-45	124.7331	4.8262	.2646	.3901	-.0673	.2646	-.3901	-.0673	.2772	.1248	.01	.2772	-.1248
1510331	13.3	146	42.5	71.8	149	-46.7	43.4	149	18.4	61.5	151	-9.5	55.1	105	19.5	68.7	107	-3.03	66.5	110	21.5	75.4	109	8.1	42.4	79	22	68.2	82.4	-16.1	64.7	90.2	15	71	91	5.39	132.811	4.8889	.2788	.4018	-.0653	.2788	-.4018	-.0653	.2737	.1254	.0259	.2737	-.1254
1800969	-76.3	83.2	-94.2	-3.93	104	-37.4	-57.7	101	-75.5	-32.1	108	-54.1	-70.3	67.4	-39.7	-51.7	71.9	-25	-73.3	77.3	-29.8	-61.9	80.8	-21.8	-75.6	35.6	-44.8	-36.7	47.5	-13.9	-71.4	53.8	-24.8	-62.2	56.7	-17.2	132.9068	4.8896	.2651	.3549	-.065	.2651	-.3549	-.065	.3083	.1282	.0136	.3083	-.1282
1710050	-6.27	92	47.2	75.9	91	.632	26.6	90.7	39.1	51.7	91.7	25.5	35.5	48.9	43.5	52.1	49.1	32.3	47.8	48.6	52.4	56.9	48.9	44.4	17	26.6	37.1	56.1	27	16.6	38.5	32.3	44.9	51.2	32.4	38.1	124.5452	4.8247	.2949	.3794	-.0554	.2949	-.3794	-.0554	.2791	.1146	.0187	.2791	-.1146
1718470	4.59	85.4	-12.9	64	69.2	-81.6	31.5	84.6	-31.5	49.2	78.2	-52	47.8	41.7	-12.7	61.1	37.7	-28.5	63.8	48.9	-6.87	71	46.7	-15.2	34	18.7	-5.98	59.2	11.1	-35.2	54.1	26	-11	60.4	24.1	-18.1	129.4452	4.8633	.3015	.3564	-.0574	.3015	-.3564	-.0574	.2969	.1074	.0127	.2969	-.1074
1804654	-2.08	30.6	11.9	73.7	22.2	-50.8	29	26.4	.199	56.3	24.2	-22.2	33.4	-22.8	-1.76	51	-24.9	-18.5	46.2	-22.5	7.85	59.3	-25	-2.8	11.8	-43.8	-5.84	47.3	-46.9	-36.5	39	-38.5	-5.38	46.3	-38.9	-12.3	135.4448	4.9086	.2955	.3644	-.0611	.2955	-.3644	-.0611	.2849	.1306	.0188	.2849	-.1306
221217	32.5	97	24.6	73.5	114	-65	54.3	108	-.604	67.9	111	-30.3	75	61.7	-2.89	85.1	63.7	-23.9	86.7	67.5	.332	95.1	66.5	-15.1	61.6	37.1	-3.65	80.1	43.6	-43.5	81.6	46	-12.4	84.7	47.2	-18.7	133.7994	4.8963	.2887	.3738	-.0585	.2887	-.3738	-.0585	.2945	.1224	.0176	.2945	-.1224
1901564	17.8	41.3	16.7	72	50.9	-53.6	39.9	47.8	-3.96	57.4	50.7	-26.9	59.1	7.96	2.16	72.4	9.87	-17.8	73.3	14.9	5.93	81.2	16.9	-5.06	46.7	-19	4.55	72.6	-14.9	-32.8	69.5	-6.36	-1.69	74.6	-5.58	-9.27	123.6091	4.8171	.2796	.3611	-.0513	.2796	-.3611	-.0513	.2896	.1173	-.0058	.2896	-.1173
1814058	-59.2	60.4	-79.9	-36.3	49	10.7	-59.3	59.7	-45.7	-52.7	56	-19.5	-70.7	21.8	-45.1	-65	20	-22.5	-80.1	23.5	-37.6	-75.8	22.5	-23.2	-66.2	-1.39	-59.4	-57.1	-5.93	-20	-73.3	4.34	-40.1	-70.6	3.16	-30.5	117.7844	4.7689	.2717	-.3997	.0626	.2717	.3997	.0626	.2779	-.1158	-.0139	.2779	.1158
1807415	33.7	84.3	23.2	79.1	102	-56.5	56.1	91.3	1.39	71.3	98.6	-25.4	78.8	48.8	1.14	92.4	53.5	-23.2	90.2	55	3.27	98.9	58.6	-11.8	69.2	23.7	.488	93	33.2	-37.1	89.4	38.7	-5.19	95.2	40.5	-14.3	129.7289	4.8654	.3026	.3601	-.0508	.3026	-.3601	-.0508	.2887	.122	.0159	.2887	-.122
1505625	1.62	141	58	82.2	143	-8.08	34.4	142	44.9	58.1	142	27.4	44.2	93.4	51.4	64.6	94.5	34.5	56.5	97.7	60.5	71.6	99.1	48.3	24.1	71.8	42.1	60.4	73.7	13.7	50.1	74.6	46.7	59.8	75.2	39	138.4784	4.9307	.2901	.3765	-.0643	.2901	-.3765	-.0643	.276	.1063	.0172	.276	-.1063
1615628	-81.2	37.9	-81.1	-24.7	72.9	-15.2	-70.7	54.5	-53.9	-52.3	65	-32.9	-74.7	19.5	-29.7	-60.5	27.4	-11.3	-84.3	28.6	-19.4	-76.4	31.9	-8.3	-73.9	-5.12	-31.4	-47.9	8.87	-.896	-74.5	11.1	-15.7	-67.9	14.6	-8.13	122.1884	4.8056	.2865	-.383	.0634	.2865	.383	.0634	.2805	-.1221	-.024	.2805	.1221
94061015	-69	43.4	-11.9	32.1	50.2	-.314	-36.7	51.6	8.73	-6.58	54.4	9.76	-32.4	9.25	22.4	-3.33	14.8	24.8	-28.9	14.2	35.8	-10.7	19.1	36.5	-42.6	-19.5	7.42	12.4	-10.7	14.8	-21.2	-8.96	29.5	-10.4	-7.93	30.4	134.7516	4.9034	.264	.3785	-.0893	.264	-.3785	-.0893	.2694	.1121	.0357	.2694	-.1121
1511501	9.02	81.2	37.4	78.6	88.5	-28.7	39.4	84.6	20.5	59.4	87	1.35	51.2	43.7	27.3	69.7	43.6	9.3	60.2	50	32.5	74.3	49.9	21.4	38.4	14.5	25.4	73.5	17.9	-7.25	61.9	26.6	24.8	69.3	26.8	17.6	129.2626	4.8618	.2858	.3724	-.0605	.2858	-.3724	-.0605	.2762	.1075	.0059	.2762	-.1075
1819529	-2.01	108	24.9	73.1	118	-52.3	31.5	104	4.82	55.1	108	-18.2	42.9	64.5	9.02	62.8	67.5	-12.9	53.1	66	11.7	68.1	68.9	-2.3	29.5	39.3	7.29	67.1	42.5	-28.6	50.3	54.1	7.09	64.6	55.2	-5.76	134.885	4.9044	.3068	.401	-.0469	.3068	-.401	-.0469	.2371	.1231	.0151	.2371	-.1231
1806447	30.6	127	8.8	101	107	-59.2	61.9	125	-8.68	83.7	118	-28.1	71.1	81.4	9.59	90.6	74.3	-9.32	89.2	84.8	15.3	98.2	81.3	7.06	57.6	54.7	16.4	87.5	45.3	-12.5	81.2	62.6	12.8	88.5	60.7	5.83	135.9484	4.9123	.2918	.3675	-.0615	.2918	-.3675	-.0615	.2912	.1102	.0175	.2912	-.1102
[truncated: 332 more columns]
